# Supplementary material for: Trajectories of job demands and control: risk for subsequent symptoms of major depression in the nationally representative Swedish Longitudinal Occupational Survey of Health (SLOSH)
Source: Springer Nature journal article supplement (doi:10.1007/s00420-017-1277-0), 2017-11-11

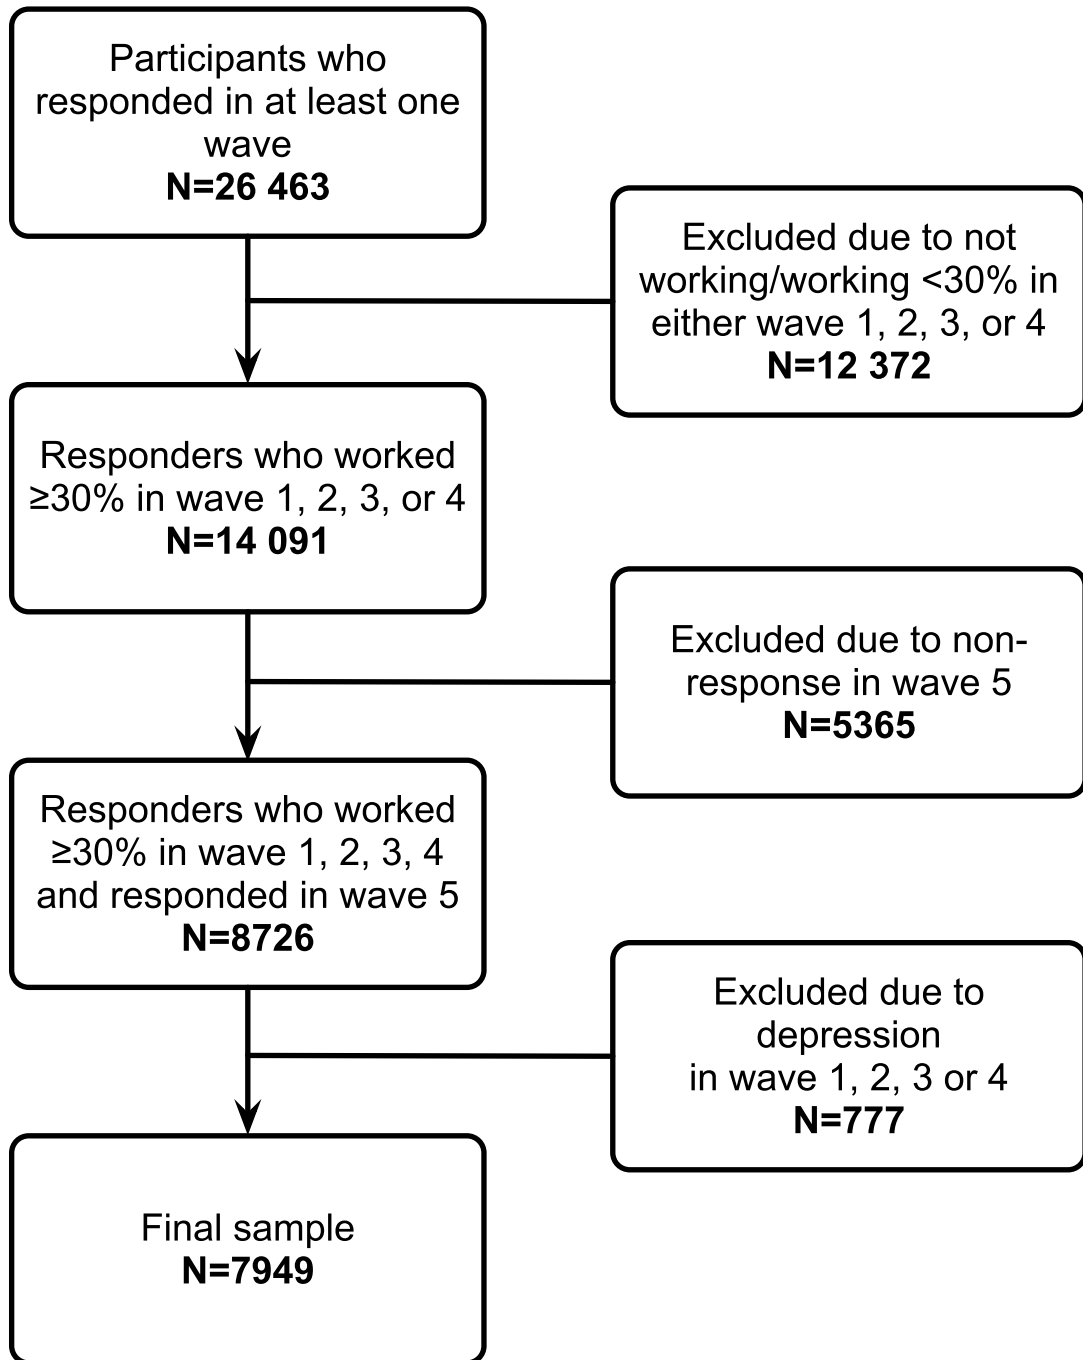

Supplement: MOESM1 [file 15215796]
