# Supplementary material for: Trajectories of job demands and control: risk for subsequent symptoms of major depression in the nationally representative Swedish Longitudinal Occupational Survey of Health (SLOSH)
Source: Springer Nature journal article supplement (doi:10.1007/s00420-017-1277-0), 2017-11-11
Supplement: MOESM2 [file 15215796]

**Online resource 2** Polynomial order, fit indices and estimate of the log Bayes factor for the univariate and joint trajectory models of job demands and control

| Models             | Demand models      |                  |                  | Control models     |                 |                  | Joint models         |                      |                  |                  |
|--------------------|--------------------|------------------|------------------|--------------------|-----------------|------------------|----------------------|----------------------|------------------|------------------|
|                    | Polynomial order   | BIC (N=7880)     | 2( $\Delta$ BIC) | Polynomial order   | BIC (N=7880)    | 2( $\Delta$ BIC) | Polynomial order     | Polynomial order     | BIC (N=7880)     | 2( $\Delta$ BIC) |
| One trajectory     | 3                  | -15905.65        | .                | 2                  | -12173.89       | -                | Demands              | Control              |                  |                  |
| Two trajectories   | 3-3                | -14073.28        | 3664.74          | 3-2                | -9406.43        | 5534.92          | .                    | .                    | .                | .                |
| Three trajectories | 3-3-2              | -13486.69        | 1173.18          | 3-3-3              | -8341.84        | 2129.18          | .                    | .                    | .                | .                |
| Four trajectories  | 3-3-3-1            | -13321.43        | 330.52           | 3-3-3-3            | -7956.03        | 771.62           | 3-3-3-1              | 3-3-3-3              | -23311.14        | .                |
| Five trajectories  | 3-3-3-1-2          | -13295.50        | 51.86            | 3-3-3-2-3          | -7827.31        | 257.44           | 3-3-3-1-2            | 3-3-3-2-3            | -22660.91        | 1300.46          |
| Six trajectories   | <b>3-3-3-3-1-2</b> | <b>-13289.41</b> | <b>12.18</b>     | <b>2-3-3-3-3-1</b> | <b>-7768.96</b> | <b>116.70</b>    | 3-3-3-3-1-2          | 2-3-3-3-3-1          | -22346.11        | 629.6            |
| Seven trajectories | 3-1-3-3-3-1-1      | -13252.31        | 74.20            | 2-3-3-3-3-2-1      | -7754.48        | 28.96            | <b>3-1-3-3-3-1-1</b> | <b>2-3-3-3-3-2-1</b> | <b>-21964.85</b> | <b>762.52</b>    |
| Eight trajectories | 3-1-3-2-2-1-1-1    | -13258.13        | -11.64           | .                  | .               | .                | 3-1-3-2-2-1-1-1      | 1-3-2-3-1-1-1-1      | -21852.08        | 225.54           |

Polynomial order: 1=linear, 2=quadratic, 3=cubic, BIC=Bayesian information criterion
