# Supplementary material for: Trajectories of job demands and control: risk for subsequent symptoms of major depression in the nationally representative Swedish Longitudinal Occupational Survey of Health (SLOSH)
Source: Springer Nature journal article supplement (doi:10.1007/s00420-017-1277-0), 2017-11-11
Supplement: MOESM5 [file 15215796]

**Online resource 5** Results from logistic regression analysis predicting major depression in wave five presented as Odds ratios (OR) and 95% confidence intervals (CI). Sensitivity analysis, including individuals with major depression in wave 1 to 4 (2006-2012).

| Joint trajectory groups           | Depression cases<br>n (%) | Modell 1    |           | Modell 2    |           | Modell 3    |           | Modell 4    |           |  |
|-----------------------------------|---------------------------|-------------|-----------|-------------|-----------|-------------|-----------|-------------|-----------|--|
|                                   |                           | OR          | CI        | OR          | CI        | OR          | CI        | OR          | CI        |  |
| Low strain (5 & 7) reference      | 49 (2.0)                  |             |           |             |           |             |           |             |           |  |
| Passive (1)                       | 16 (5.2)                  | <b>2.61</b> | 1.47-4.65 | 1.58        | 0.86-2.90 | <b>2.32</b> | 1.30-4.17 | 1.49        | 0.81-2.77 |  |
| Passive (2)                       | 27 (2.4)                  | 1.18        | 0.73-1.89 | 1.09        | 0.66-1.77 | 1.12        | 0.69-1.80 | 1.06        | 0.64-1.74 |  |
| High strain (3)                   | 61 (7.8)                  | <b>4.05</b> | 2.76-5.96 | <b>1.94</b> | 1.29-2.92 | <b>3.54</b> | 2.39-5.24 | <b>1.86</b> | 1.23-2.82 |  |
| Hybrid (4)                        | 89 (3.2)                  | <b>1.58</b> | 1.11-2.26 | 1.23        | 0.85-1.78 | <b>1.51</b> | 1.06-2.16 | 1.23        | 0.84-1.78 |  |
| Active (6)                        | 69 (5.8)                  | <b>2.93</b> | 2.02-4.25 | <b>1.61</b> | 1.09-2.38 | <b>2.65</b> | 1.81-3.86 | <b>1.57</b> | 1.05-2.33 |  |
| <b>Covariates</b> <sup>a</sup>    |                           |             |           |             |           |             |           |             |           |  |
| Previous depressive symptoms      |                           | .           | .         | <b>1.20</b> | 1.18-1.22 | .           | .         | <b>1.19</b> | 1.17-1.21 |  |
| Age (continuous)                  |                           | .           | .         | .           | .         | <b>0.97</b> | 0.96-0.98 | <b>0.97</b> | 0.97-0.99 |  |
| Women                             |                           | .           | .         | .           | .         | <b>1.70</b> | 1.32-2.19 | <b>1.39</b> | 1.07-1.81 |  |
| No children at home               |                           | .           | .         | .           | .         | 0.71        | 0.55-0.91 | 0.79        | 0.61-1.02 |  |
| Civil status (married/cohabiting) |                           | .           | .         | .           | .         | <b>0.61</b> | 0.47-0.80 | 0.77        | 0.58-1.02 |  |

Model 1: Unadjusted model. Model 2: Adjusted for previous depressive symptoms. Model 3: Adjusted for age, sex, children at home and civil status. Model 4: Adjusted for previous depressive symptoms, age, sex, children at home and civil status. Numbers in bold are statistically significant at  $p < 0.05$ . <sup>a</sup> If data were missing in wave two, data from the earliest available wave was used.
